# Supplementary material
Source: PubMed Central journal article supplement (PMC4959225)
Supplement: AEM.00294-16_zam011167164so1.pdf [file AEM.00294-16_zam011167164so1.pdf]

## Supplementary information

### Steady-State Growth under Inorganic Carbon Limitation Conditions Increases Energy Consumption for Maintenance and Enhances Nitrous Oxide Production in *Nitrosomonas europaea*.

Brett L. Mellbye<sup>a#</sup>, Andrew Giguere<sup>b</sup>, Frank Chaplen<sup>c</sup>, Peter J. Bottomley<sup>b,d</sup>, Luis A. Sayavedra-Soto<sup>a#</sup>.

<sup>a</sup>Department of Botany and Plant Pathology, Oregon State University, Corvallis, Oregon, USA<sup>a</sup>; <sup>b</sup>Department of Crop and Soil Science, Oregon State University, Corvallis, Oregon, USA<sup>b</sup>;

<sup>c</sup>Biological and Ecological Engineering, Oregon State University, Corvallis, Oregon, USA<sup>c</sup>;

<sup>d</sup>Department of Microbiology, Oregon State University, Corvallis, Oregon, USA<sup>d</sup>

<sup>#</sup>Address correspondence to Brett L. Mellbye, [mellbye@science.oregonstate.edu](mailto:mellbye@science.oregonstate.edu), and Luis A. Sayavedra-Soto, [sayavedl@science.oregonstate.edu](mailto:sayavedl@science.oregonstate.edu).

#### **This PDF file includes:**

Supplementary Methods

Supplementary Tables 1-3

Supplementary Figure 1

Supplementary References

## SUPPLEMENTAL MATERIALS AND METHODS

**Chemostat experiments.** Chemostat culture experiments to determine maintenance energy were carried out as outlined in the main text materials and methods with minor changes. To determine maintenance energy under ammonia (NH<sub>3</sub>)-limited conditions, medium consisted of 5 mM (NH<sub>4</sub>)<sub>2</sub>SO<sub>4</sub> and mineral salts as described (1). Inorganic carbon (IC)-limited maintenance energy was calculated using culture conditions and data (see Fig. 2) from the main text.

**Dry cell weight calculations.** Assume that the specific growth rate,  $\mu$ , for each organism is equal to the dilution rate,  $D$ ; i.e., assume that the saturation constant for the limiting substrate,  $K_s$ , is small. Dry cell weight in chemostat (DCW<sub>c</sub>) from optical density at 600 nm (OD<sub>600</sub>) was calculated from end point values for DCW and OD<sub>600</sub> from fed-batch cultures (2). The conversion value calculated was 0.160 gDCW L<sup>-1</sup> OD<sub>600</sub><sup>-1</sup> for *Nitrosomonas europaea* (Eqn. S.1).

$$S.1 \quad gDCW_c = 0.16 \frac{gDCW}{L OD} * OD$$

**Growth yield calculations.** Calculation of the rate ( $q$ ) of ammonia/ammonium (substrate) consumption was accomplished as outlined in Eqn. S.2.

$$S.2 \quad q(\text{substrate}) = \frac{\text{Dilution Rate}(\text{Outlet Concentration Substrate} - \text{Inlet Concentration Substrate})}{\text{Cell Concentration in Chemostat}}$$

Apparent growth yield expressed as cells produced per substrate consumed (gDCW [mmol NH<sub>3</sub>]<sup>-1</sup>) was calculated as outlined in Eqn. S.3 and S.4 where gDCW<sub>p</sub> is dry cell weight produced through cell growth.

$$S.3 \quad \text{Yield} = \left| \frac{q_x}{q_{NH_3}} \right|$$

$$S.4 \quad Yield = \left| \frac{D * \frac{gDCWp}{gDCWc h}}{\frac{mol}{gDCWc h}} \right| = \frac{gDCWp}{mmol}$$

**Maintenance energy calculations.** Cellular maintenance energy ( $m$ ) was calculated based on the specific growth rate assumptions outlined above and the growth yield using the Pirt equation (Eqn. S.5) with  $D$  substituted for  $\mu$  (3-5). The intercept is the maintenance energy and the slope is the inverse growth yield in the absence of consumption of substrate for maintenance ( $Y_g$ , true growth yield).

$$S.5 \quad q = \frac{D}{Y_G} + m$$

**Table S1.** Statistically significant changes in gene expression during IC limitation.

| Gene number                            | Gene name                    | Role                                                                | Fold change <sup>a</sup> |
|----------------------------------------|------------------------------|---------------------------------------------------------------------|--------------------------|
| C fixation and metabolism              |                              |                                                                     |                          |
| NE0050-0051                            | <i>sucC, sucD</i>            | succinyl-CoA synthetase                                             | -1.41 to<br>-1.77        |
| NE0325-0328                            | <i>pykA, pgk, cbbG, cbbT</i> | Gluconeogenesis, carbon fixation                                    | 1.39 to 1.82             |
| NE0606                                 | <i>cah</i>                   | carbonic anhydrase                                                  | -1.25 to<br>-1.56        |
| NE1730                                 | <i>icd</i>                   | isocitrate dehydrogenase                                            | 1.78 to 2.19             |
| NE1917-1922                            | <i>cbbOQSR, rbcL</i>         | RuBisCO gene cluster                                                | 1.81 to 19.88            |
| NE1926                                 | <i>cynT</i>                  | carbonic anhydrase                                                  | 1.42 to 1.45             |
| Amino acid and nucleotide biosynthesis |                              |                                                                     |                          |
| NE1319-1320                            | <i>leuA1</i>                 | leucine biosynthesis                                                | 2.03 to 2.29             |
| NE1323                                 | <i>ilvC</i>                  | valine/isoleucine biosynthesis                                      | 1.31 to 1.71             |
| NE1661-1662                            | <i>carA, carB</i>            | carbamoyl-phosphate synthase (arginine and pyrimidine biosynthesis) | 1.44 to 2.01             |
| N metabolism                           |                              |                                                                     |                          |
| NE0448                                 | <i>rh50</i>                  | ammonium uptake                                                     | -2.04 to<br>-3.58        |
| NE0924-0927                            | <i>aniA (nirK) gene</i>      | nitrite reductase and                                               | 1.57 to 3.31             |

|                                              |                            |                           |                           |
|----------------------------------------------|----------------------------|---------------------------|---------------------------|
|                                              | loci                       | electron transport        |                           |
| NE0941-0945,                                 | <i>amo</i> gene loci 1 and | ammonia oxidation         | -1.33 to                  |
| NE2057-2064                                  | 2                          |                           | -2.57                     |
| NE1411                                       | <i>amoC3</i>               | ammonia oxidation         | 1.00                      |
| NE0962, NE2044,                              | <i>hao1, hao2, hao3</i>    | hydroxylamine oxidation   | 1.00                      |
| NE2339                                       |                            |                           |                           |
| NE2003-2004                                  | <i>norC, norB</i>          | NO reductase              | 1.00 to                   |
|                                              |                            |                           | -1.59                     |
| Electron Transport and Energy Transformation |                            |                           |                           |
| NE0143                                       |                            | nitrosocyanin             | 1.37 <sup>b</sup>         |
| NE0199-0206                                  | <i>atp</i> gene loci       | ATP synthase              | 1 to 2.30                 |
| NE0278                                       |                            | Heme biosynthesis         | 1.56 to 1.76              |
| NE0314-316                                   | <i>mxnG</i>                | multi-copper oxidase gene | -1.26 to                  |
|                                              |                            | cluster                   | -6.38                     |
| NE0508-0510                                  | <i>SCO1/senC</i>           | cytochrome assembly       | 1.88 to 2.51 <sup>b</sup> |
| NE0681-0684                                  | <i>SCO1/senC, coxA2,</i>   | cytochrome c oxidase      | -1.47 to                  |
|                                              | <i>coxB</i>                |                           | -2.13                     |
| NE0764-0765                                  | <i>ccmA, ccmB</i>          | cytochrome biogenesis     | 1.26 to 1.77              |
| NE0959, NE2336                               | <i>cycX3, cycX1</i>        | c554-associated           | -1.37 <sup>c</sup> to     |
|                                              |                            | cytochromes               | -1.41 <sup>c</sup>        |
| NE1215                                       |                            | short-chain               | -1.46 to                  |
|                                              |                            | dehydrogenase/reductase   | -1.84                     |
| NE1230-1245                                  |                            | oxidoreductase/unknown    | -1.48 to                  |

|                                              |                                             |                                                           |                   |
|----------------------------------------------|---------------------------------------------|-----------------------------------------------------------|-------------------|
|                                              |                                             | gene cluster                                              | -5.00             |
| NE1313-1315                                  | <i>ccp</i>                                  | cytochrome c551                                           | -1.45 to          |
|                                              |                                             | peroxidase gene cluster                                   | -2.08             |
| NE1764-1777                                  | <i>nuo</i> gene loci                        | NADH dehydrogenase                                        | 1.00 to 1.97      |
| NE1838, NE1868-1869                          | <i>ubiA, ubiB</i> , putative<br><i>ubiJ</i> | ubiquinone biosynthesis                                   | 1.56 to 2.07      |
| NE1951                                       |                                             | adenylosuccinate lyase                                    | 1.71 to 2.23      |
| NE2130                                       | <i>rnk</i>                                  | regulator of nucleotide<br>diphosphate kinases            | 1.98 to 2.06      |
| NE2393-2397                                  | <i>nqr</i> gene loci                        | Na <sup>+</sup> -translocating NADH-<br>quinone reductase | -1.30 to<br>-1.89 |
| Carbon metabolism linked to photorespiration |                                             |                                                           |                   |
| NE0221-0223                                  |                                             | Folate biosynthesis                                       | 1.58 to 1.89      |
| NE0362                                       | <i>folD</i>                                 | C1 pool folate metabolism                                 | 1.43 to 1.62      |
| NE0607-0611                                  | <i>gcv</i> gene loci                        | Glycine cleavage system                                   | 1.46 to 2.66      |
| Fatty acid and phospholipid metabolism       |                                             |                                                           |                   |
| NE0741                                       |                                             | 4-cresol dehydrogenase                                    | -1.56 to<br>-1.96 |
| NE1645, NE0612,                              | <i>plsX, plsC, cdsA,</i>                    | phosphatidylethanolamine                                  | 1.42 to 2.43      |
| NE1713, NE1321-1322                          | <i>pssA, psd</i>                            | biosynthesis                                              |                   |
| NE1646                                       | <i>fabH</i>                                 | 3-oxoacyl-ACP synthase                                    | 1.37 to 1.41      |
| NE2348-2353                                  | <i>fadE1, ydiD, moeZ</i>                    | fatty acid degradation loci                               | -1.53 to          |

|                          |             |                                                                          |                   |
|--------------------------|-------------|--------------------------------------------------------------------------|-------------------|
|                          |             |                                                                          | -2.46             |
| Replication              |             |                                                                          |                   |
| NE0433                   | <i>dnaX</i> | DNA pol III $\gamma/\tau$                                                | 1.37 to 1.43      |
| NE0442                   | <i>holC</i> | DNA pol III $\chi$                                                       | 1.52 to 1.67      |
| Signaling/ Transcription |             |                                                                          |                   |
| NE0533-536,<br>NE0557    |             | ECF sigma factors (sigma<br>70-type) and membrane-<br>associated factors | -2.32 to<br>-4.38 |
| NE0584-0586              | <i>rpoH</i> | Heat-shock sigma factor 32<br>and associated genes                       | 1.42 to 2.57      |
| NE0895-0896              |             | hypothetical DNA-binding                                                 | 1.53 to 2.37      |
| NE1035                   | <i>rho</i>  | termination factor $\rho$                                                | 2.07 to 2.58      |
| NE1079, NE2435           | <i>fecI</i> | ECF sigma factors                                                        | 1.48 to 3.03      |
| NE1287                   | <i>hfq</i>  | small RNA regulator                                                      | -1.34 to<br>-2.04 |
| NE1313                   |             | DnaJ/RegA homolog                                                        | -1.45 to<br>-2.08 |
| NE1477                   | <i>hrcA</i> | heat-inducible repressor                                                 | 1.35 to 1.53      |
| NE1660                   | <i>greA</i> | transcription elongation                                                 | 1.42 to 1.47      |
| NE2138                   |             | ECF sigma factor                                                         | -2.48 to<br>-3.46 |
| NE2291                   |             | cAMP phosphodiesterase                                                   | 1.67 <sup>b</sup> |
| Transport                |             |                                                                          |                   |

|                                                                       |                                                     |                                                |                           |
|-----------------------------------------------------------------------|-----------------------------------------------------|------------------------------------------------|---------------------------|
| NE0827, NE1453-1454                                                   |                                                     | ABC-type gene clusters                         | 1.61 to 2.18              |
| NE0869                                                                | <i>exbD/tolR</i>                                    | biopolymer transport                           | -1.43 to<br>-1.61         |
| NE1196                                                                |                                                     | ABC-type transporter                           | -1.44 to<br>-1.86         |
| NE1529-1532,<br>NE1535-37                                             |                                                     | TonB-dependent receptor<br>gene clusters       | -1.64 to<br>-5.75         |
| NE1541-42                                                             |                                                     | putative hemin transport                       | 2.04 to 5.60 <sup>b</sup> |
| NE1834                                                                | <i>trkA</i>                                         | K <sup>+</sup> transporter                     | 1.50 to 1.70              |
| NE1906                                                                |                                                     | monovalent cation/H <sup>+</sup><br>antiporter | 1.85 to 2.05              |
| NE2059                                                                |                                                     | copper export                                  | -1.56 to<br>-1.69         |
| NE2290                                                                |                                                     | type II secretion protein E                    | 1.82 <sup>b</sup>         |
| Ribosomal                                                             |                                                     |                                                |                           |
| NE0196-0197,<br>NE0400-0407,<br>NE1292-1293,<br>NE1483-1484<br>NE1825 | <i>rpsRFUJSCI, rnpA,<br/>rpmHA,<br/>rplCDWBVUMY</i> | Ribosome-associated<br>proteins                | 1.23 to 2.89              |
| NE0399                                                                | <i>tuf2_1</i>                                       | Elongation factor Tu                           | 1.51 to 2.15              |
| NE0955                                                                | <i>rplT</i>                                         | Ribosome-associated                            | -1.42 to                  |



|                                       |                           |                                                                                    |                   |
|---------------------------------------|---------------------------|------------------------------------------------------------------------------------|-------------------|
|                                       |                           | proteins                                                                           | -1.48             |
| NE1672                                | <i>rim</i>                | 16S rRNA-processing                                                                | 1.38 to 1.56      |
| Protein synthesis and stress response |                           |                                                                                    |                   |
| NE0027-0031,                          | <i>groES, groEL, tig,</i> | chaperonins, protein                                                               | 1.28 to 5.39      |
| NE0035                                | <i>clpP</i>               | export/processing                                                                  |                   |
| NE0084                                |                           | thioredoxin                                                                        | -1.27 to<br>-1.46 |
| NE0367                                |                           | TrxA homolog<br>(thioredoxin)                                                      | -1.45 to<br>-1.74 |
| NE0813                                | <i>sspB</i>               | stringent starvation protein<br>B                                                  | 1.38 to 1.42      |
| NE1201                                |                           | UspA homolog                                                                       | -1.29 to<br>-1.51 |
| NE1312                                | <i>cspD2_1</i>            | cold shock protein                                                                 | 1.73 to 1.81      |
| NE1712                                | <i>dxr</i>                | 1-deoxy-D-xylulose 5-<br>phosphate<br>reductoisomerase<br>(terpenoid biosynthesis) | 1.44 to 1.95      |
| NE1948                                | <i>dnaJ</i>               | heat shock chaperonin                                                              | 1.51 to 1.74      |
| NE1950                                | <i>grpE</i>               | heat shock chaperonin                                                              | 1.64 to 1.66      |
| NE2074-2076                           |                           | HSP20 family gene cluster                                                          | -1.37 to<br>-2.61 |
| NE2131                                | <i>phoB</i>               | phosphate regulon                                                                  | 1.80 <sup>b</sup> |

|                                                                                                                                               |              |                                                    |                   |
|-----------------------------------------------------------------------------------------------------------------------------------------------|--------------|----------------------------------------------------|-------------------|
| NE2292                                                                                                                                        | <i>yxiE</i>  | universal stress protein                           | 1.59 <sup>b</sup> |
| NE2553-2554                                                                                                                                   | <i>typA</i>  | GTP-binding, stress-associated gene cluster        | 1.61 to 2.32      |
| Hypothetical                                                                                                                                  |              |                                                    |                   |
| NE0155, NE0230, NE0251, NE0271 <sup>b</sup> , NE0453, NE0585, NE0895, NE1821, NE1839                                                          |              | mobile element or phage-associated                 | 1.56 to 3.09      |
| NE0255-0256, NE0588, NE0745, NE1135, NE1179, NE1230, NE1350, NE1353, NE1363, NE1379-1380, NE1790, NE2151-2154, NE2409, NE2413, NE2441, NE2513 |              | mobile element or phage-associated                 | -1.33 to -12.36   |
| NE1445-1452                                                                                                                                   | <i>ycf16</i> | NifU domain and Fe-S cluster assembly gene cluster | -1.58 to -2.15    |
| NE1542                                                                                                                                        |              | conserved hypothetical                             | 5.60 <sup>b</sup> |

|             |                                              |                   |
|-------------|----------------------------------------------|-------------------|
| NE1545      | pirin domain                                 | -5.56 to<br>-8.00 |
| NE1546      | putative oxidoreductase                      | -2.80 to<br>-3.08 |
| NE2218      | conserved hypothetical                       | 8.00 <sup>b</sup> |
| NE2544-2545 | hypothetical, potential<br>DNA-binding motif | 1.66 to 3.56      |

---

<sup>a</sup>Fold change is the difference in mRNA transcripts between the control (replete inorganic C) and the treatment (1.0 mM or 0.2 mM Na<sub>2</sub>CO<sub>3</sub>) ( $p \leq 0.05$ ). A value of 1.00 indicates no statistically significant change in at least one of the listed genes.

<sup>b</sup>Significant fold change only observed in 0.2 mM Na<sub>2</sub>CO<sub>3</sub> treatment.

<sup>c</sup>Significant fold change only observed in 1.0 mM Na<sub>2</sub>CO<sub>3</sub> treatment

**Table S2.** Comparison of fold change expression between replete and IC-limited treatments analyzed by qPCR and mRNA-Seq.

| Gene; name          | 1.0 mM Na <sub>2</sub> CO <sub>3</sub> treatment |       | 0.2 mM Na <sub>2</sub> CO <sub>3</sub> treatment |       |
|---------------------|--------------------------------------------------|-------|--------------------------------------------------|-------|
|                     | fold change                                      |       | fold change                                      |       |
|                     | mRNA-Seq                                         | qPCR  | mRNA-Seq                                         | qPCR  |
| NE0328; <i>cbbT</i> | 1.82                                             | 2.64  | 1.40                                             | 1.23  |
| NE0448; <i>rh50</i> | -3.58                                            | -3.31 | -2.03                                            | -1.96 |
| NE0533; Sigma-70    | -4.17                                            | -2.49 | -4.38                                            | -4.75 |
| NE1238; oxygenase   | -3.01                                            | -1.35 | -1.61                                            | -2.92 |
| NE1918; <i>cbbO</i> | 15.66                                            | 15.97 | 12.58                                            | 9.21  |
| NE1919; <i>cbbQ</i> | 19.88                                            | 15.46 | 14.15                                            | 11.98 |
| NE1921; <i>rbcL</i> | 8.12                                             | 9.49  | 7.42                                             | 5.45  |

**Table S3.** Genes and primers used to corroborate gene expression expression.

| Gene name   | Left primer          | Right primer          |
|-------------|----------------------|-----------------------|
| NE0328;     | NE0328_L:            | NE0328_R:             |
| <i>cbbT</i> | ACAGGACAAACCCACACTGA | CTGCAGCAATTTTCGTCATTT |
| NE0448;     | NE0448_L:            | NE0448_R:             |
| <i>rh50</i> | GTTGTGTTTCAGCAGTTGGG | GCATGGCCAGAATGTTTATG  |
| NE0533;     | NE0533_L:            | NE0533_R:             |
| Sigma-70    | CTGATGCTGATCGATGGACT | CTGATCGAGACTTGCATCGT  |
| NE1238;     | NE1238_L:            | NE1238_R:             |
| oxygenase   | CCTCATCTGCAATCATCCAC | GAAGCTGGTCAATTGCTTCA  |
| NE1918;     | NE1918_L:            | NE1918_R:             |
| <i>cbbO</i> | GTGCAGCTTGCTCATGAAAT | ATCGCTCGAAATCAAATTCC  |
| NE1919;     | NE1919_L:            | NE1919_R:             |
| <i>cbbQ</i> | GGCGCGTAATCTTAAAGGTC | TACGACAAGCTGCATGAACA  |
| NE1921;     | NE1921_L:            | NE1921_R:             |
| <i>rbcL</i> | TGGAAGCAATCCATAAGGC  | GCTCTTTGGCATATTCAGCA  |

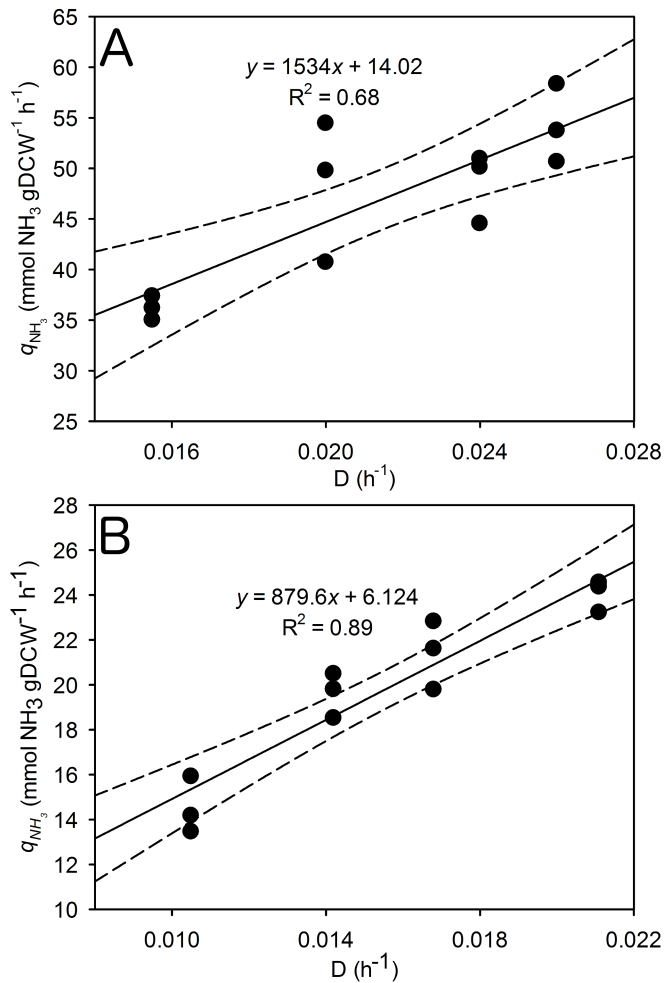

**Figure S1.** Maintenance energy during IC-limited (**A**) and  $\text{NH}_3$ -limited (**B**) growth.

Maintenance energy is calculated based on the  $y$  intercept of the linear trend observed when comparing the rate of  $\text{NH}_3$  consumption ( $q_{\text{NH}_3}$ , mM  $\text{NH}_3$  consumed gDCW $^{-1}$  h $^{-1}$ ;  $y$ -axis) to dilution rate ( $D$ , h $^{-1}$ ;  $x$ -axis). The straight black line is the regression of  $q_{\text{NH}_3}$  compared to  $D$  and dotted lines indicate the 95% confidence band. The regression for IC-limited growth (**A**) was  $y = 1534x + 14.02$ ,  $R^2 = 0.68$ , and the predicted maintenance energy was 14.0 mmol  $\text{NH}_3$  gDCW $^{-1}$  h $^{-1}$ . The regression for  $\text{NH}_3$ -limited growth (**B**) was  $y = 879.6x + 6.124$ ,  $R^2 = 0.89$ , and the predicted maintenance energy was 6.12 mmol  $\text{NH}_3$  gDCW $^{-1}$  h $^{-1}$ . Outlier replicates that deviated  $\geq 20\%$  from the mean were removed from analysis.

## SUPPLEMENTAL REFERENCES

1. **Pérez J, Buchanan A, Mellbye B, Ferrell R, Chang JH, Chaplen F, Bottomley PJ, Arp DJ, Sayavedra-Soto LA.** 2015. Interactions of *Nitrosomonas europaea* and *Nitrobacter winogradskyi* grown in co-culture. Arch Microbiol **197**:79-89.
2. **Farges B, Poughon L, Roriz D, Creuly C, Dussap CG, Lasseur C.** 2012. Axenic cultures of *Nitrosomonas europaea* and *Nitrobacter winogradskyi* in autotrophic conditions: a new protocol for kinetic studies. Appl Biochem Biotechnol **167**:1076-1091.
3. **Pirt SJ.** 1965. The maintenance energy of bacteria in growing cultures. Proc R Soc Lond B Biol Sci **163**:224-231.
4. **Russell JB, Baldwin RL.** 1979. Comparison of maintenance energy expenditures and growth yields among several rumen bacteria grown on continuous culture. Appl Environ Microbiol **37**:537-543.
5. **van Bodegom P.** 2007. Microbial maintenance: a critical review on its quantification. Microb Ecol **53**:513-523.
